# Supplementary material for: Hospitalization costs of injury in elderly population in China: a quantile regression analysis
Source: Springer Nature journal article supplement (doi:10.1186/s12877-023-03729-0), 2023-03-14
Supplement: MOESM1 [file 24623002]

Additional file1. Description of detailed composition of injury types

| Type of injury                                               | ICD-10  | Number of cases |
|--------------------------------------------------------------|---------|-----------------|
| Injuries to the head                                         | S00-S09 | 657             |
| Injuries to the hip and thigh                                | S70-S79 | 303             |
| Injuries to the abdomen, lower back, lumbar spine and pelvis | S30-S39 | 184             |
| Injuries to the thorax                                       | S20-S29 | 179             |
| Injuries to the knee and lower leg                           | S80-S89 | 123             |
| Injuries to the shoulder and upper arm                       | S40-S49 | 75              |
| Injuries to the elbow and forearm                            | S50-S59 | 46              |
| Injuries to the ankle and foot                               | S90-S99 | 36              |
| Injuries to the wrist and hand                               | S60-S69 | 35              |
| Injuries to the neck                                         | S10-S19 | 30              |
| Injuries to unspecified parts of trunk, limb or body region  | T08-T14 | 20              |
| Injuries involving multiple body regions                     | T00-T07 | 19              |
| Total                                                        |         | 1707            |
