# Supplementary material for: Hospitalization costs of injury in elderly population in China: a quantile regression analysis
Source: Springer Nature journal article supplement (doi:10.1186/s12877-023-03729-0), 2023-03-14
Supplement: MOESM2 [file 24623002]

Additional file 2. Description of detailed composition of causes of trauma

| <b>Cause of injury</b>                                                                  | <b>ICD-10</b>  | <b>Number of cases</b> |
|-----------------------------------------------------------------------------------------|----------------|------------------------|
| Falls                                                                                   | W00-W19        | 901                    |
| Transport accidents                                                                     | V01-V99        | 528                    |
| Exposure to inanimate mechanical forces                                                 | W20-W49        | 53                     |
| Exposure to animate mechanical forces                                                   | W50-W64        | 31                     |
| Other accidental threats to breathing                                                   | W75-W84        | 2                      |
| Exposure to forces of nature                                                            | X30-X39        | 1                      |
| Accidental poisoning by and exposure to noxious substances                              | X40-X49        | 1                      |
| Overexertion, travel and privation                                                      | X50-X57        | 5                      |
| Accidental exposure to other and unspecified factors                                    | X58-X59        | 107                    |
| Intentional self-harm                                                                   | X60-X84        | 7                      |
| Assault                                                                                 | X85-Y09        | 16                     |
| Event of undetermined intent                                                            | Y10-Y34        | 45                     |
| Sequelae of external causes of morbidity and mortality                                  | Y85-Y89        | 1                      |
| Supplementary factors related to causes of morbidity and mortality classified elsewhere | Y90-Y98        | 7                      |
| <b>Falls</b>                                                                            | <b>W00-W19</b> | <b>901</b>             |
| Fall on same level from slipping, tripping and stumbling                                | W01            | 274                    |
| Other fall on same level due to collision with, or pushing by, another person           | W03            | 2                      |
| Fall involving bed                                                                      | W06            | 15                     |
| Fall involving chair                                                                    | W07            | 8                      |
| Fall involving other furniture                                                          | W08            | 3                      |
| Fall on and from stairs and steps                                                       | W10            | 7                      |
| Fall on and from ladder                                                                 | W11            | 4                      |
| Fall from, out of or through building or structure                                      | W13            | 10                     |

Additional file 2. Description of detailed composition of causes of trauma (*Continued*)

| <b>Cause of injury</b>                                                | <b>ICD-10</b> | <b>Number of cases</b> |
|-----------------------------------------------------------------------|---------------|------------------------|
| Other fall from one level to another                                  | W17           | 15                     |
| Other fall on same level                                              | W18           | 31                     |
| Unspecified fall                                                      | W19           | 528                    |
| <b>Transport accidents</b>                                            | V01-V99       | 528                    |
| Pedestrian injured in transport accident                              | V01-V09       | 184                    |
| Pedal cyclist injured in transport accident                           | V10-V19       | 80                     |
| Motorcycle rider injured in transport accident                        | V20-V29       | 18                     |
| Occupant of three-wheeled motor vehicle injured in transport accident | V30-V39       | 13                     |
| Car occupant injured in transport accident                            | V40-V49       | 4                      |
| Bus occupant injured in transport accident                            | V70-V79       | 4                      |
| Other land transport accidents                                        | V80-V89       | 196                    |
| Other and unspecified transport accidents                             | V98-V99       | 29                     |
