# Supplementary material for: Hospitalization costs of injury in elderly population in China: a quantile regression analysis
Source: Springer Nature journal article supplement (doi:10.1186/s12877-023-03729-0), 2023-03-14
Supplement: MOESM3 [file 24623002]

Additional file 3. Distribution of hospitalization costs and their changing trends during 6 years

| year | Medicine costs (%) | Material costs (%) | Nursing costs (%) | Examination costs (%) | General medical services costs (%) | General treatment handling costs (%) | Surgical costs (%) | Blood costs (%) | Other costs (%) |
|------|--------------------|--------------------|-------------------|-----------------------|------------------------------------|--------------------------------------|--------------------|-----------------|-----------------|
| 2017 | 41.93              | 11.01              | 3.03              | 20.15                 | 5.1                                | 7.32                                 | 3.85               | 1.56            | 6.05            |
| 2018 | 39.41              | 7.96               | 3.32              | 21.4                  | 5.23                               | 7.81                                 | 4                  | 1.7             | 9.17            |
| 2019 | 35.26              | 10.13              | 3.29              | 23.99                 | 4.74                               | 7.87                                 | 4.62               | 1.59            | 8.51            |
| 2020 | 32.35              | 13.62              | 3.47              | 23.56                 | 4.77                               | 7.37                                 | 5.1                | 1.94            | 7.82            |
| 2021 | 29.79              | 16.55              | 3.05              | 24.57                 | 4.16                               | 6.72                                 | 5.06               | 1.84            | 8.26            |
| 2022 | 26.34              | 18.87              | 4.98              | 24.12                 | 3.65                               | 9.16                                 | 4.74               | 1.07            | 7.07            |
| Z    | -2.7649            | 2.4348             | 0.5912            | 0.8221                | -0.5946                            | 0.2433                               | 0.4646             | -0.1592         | 0.0748          |
| P    | 0.0057             | 0.0149             | 0.5544            | 0.411                 | 0.5521                             | 0.8078                               | 0.6422             | 0.8735          | 0.9404          |

Note: Data for 2022 only includes data from January to March.
