# Supplementary material for: Hospitalization costs of injury in elderly population in China: a quantile regression analysis
Source: BMC Geriatr. 2023 Mar 14;23:143. doi: 10.1186/s12877-023-03729-0 (PMC10013238; doi:10.1186/s12877-023-03729-0)
Supplement: Supplementary file 4 — Additional file 4: Table S1. Multivariable quantile regression on hospitalization costs of the total trauma patients: Adjusting for the time factor. [file 12877_2023_3729_MOESM4_ESM.xlsx]

## Sheet: Sheet1
Table S1 Multivariable quantile regression on hospitalization costs of the total trauma patients: Adjusting for the time factor
	Overall		Quantile regression (Ln (Hospitalization costs))
			10th percentile		25th percentile		50th percentile		75th percentile		90th percentile
	coeff	95%CI	coeff	95%CI	coeff	95%CI	coeff	95%CI	coeff	95%CI	coeff	95%CI
Age (ref≥90)
65-69	0.12	(-0.12-0.37)	0.19	(-0.48-0.87)	0.1	(-0.22-0.42)	0.12	(-0.20-0.44)	-0.01	(-0.28-0.27)	-0.18	(-0.49-0.14)
70-74	0.13	(-0.12-0.37)	0.36	(-0.32-1.04)	0.08	(-0.22-0.39)	0.07	(-0.24-0.38)	-0.01	(-0.29-0.26)	-0.18	(-0.49-0.13)
75-79	0.14	(-0.10-0.39)	0.31	(-0.36-0.97)	0.08	(-0.23-0.39)	0.11	(-0.22-0.44)	0.05	(-0.23-0.34)	-0.11	(-0.43-0.21)
80-84	0.11	(-0.14-0.35)	0.34	(-0.35-1.03)	0.1	(-0.22-0.42)	0.06	(-0.26-0.38)	-0.01	(-0.29-0.27)	-0.12	(-0.43-0.19)
85-89	0.11	(-0.15-0.37)	0.27	(-0.45-0.99)	0.1	(-0.21-0.41)	0.06	(-0.29-0.40)	0.02	(-0.27-0.32)	-0.16	(-0.49-0.17)
Gender: Male (ref=Female)	0.09**	(0.03-0.15)	0.11	(-0.00-0.22)	0.12***	(0.05-0.20)	0.11**	(0.05-0.17)	0.07*	(0.02-0.13)	0.13**	(0.05-0.21)
Medical Payment type (ref=Other)
Basic Medical Insurance	0.08*	(0.00-0.17)	0.13	(-0.02-0.28)	0.07	(-0.03-0.16)	0.03	(-0.06-0.13)	0.04	(-0.04-0.11)	0.05	(-0.07-0.17)
Entire self-pay	-0.07	(-0.15-0.01)	-0.14	(-0.31-0.04)	-0.11	(-0.23-0.00)	-0.11*	(-0.21--0.01)	-0.01	(-0.09-0.08)	0.1	(-0.03-0.23)
Cause of injury (ref=Other)
Falls (W00-W19)	0.10*	(0.00-0.20)	0.05	(-0.12-0.21)	0.14*	(0.03-0.24)	0.11	(-0.00-0.24)	0.09	(-0.01-0.18)	0.11	(-0.04-0.25)
Transport accidents (V01-V99)	0.08	(-0.03-0.18)	-0.05	(-0.25-0.15)	0.11	(-0.01-0.24)	0.06	(-0.06-0.18)	0.04	(-0.07-0.14)	0.05	(-0.09-0.19)
Exposure to inanimate mechanical forces (W20-W49)	-0.06	(-0.25-0.12)	-0.07	(-0.33-0.19)	-0.14	(-0.34-0.06)	-0.11	(-0.31-0.09)	-0.11	(-0.37-0.14)	-0.08	(-0.39-0.23)
Exposure to animate mechanical forces (W50-W64)	-0.2	(-0.43-0.03)	-0.28	(-0.72-0.15)	-0.32	(-0.73-0.08)	-0.1	(-0.40-0.20)	-0.30*	(-0.57--0.03)	-0.34	(-0.98-0.30)
Type of injury (ref=Other)
Injuries to the head (S00-S09)	0.03	(-0.07-0.12)	0.04	(-0.15-0.23)	0.06	(-0.05-0.17)	-0.03	(-0.13-0.08)	-0.04	(-0.13-0.04)	0.01	(-0.12-0.15)
Injuries to the hip and thigh (S70-S79)	0.14*	(0.03-0.26)	0.18	(-0.02-0.38)	0.18**	(0.05-0.31)	0.13*	(0.01-0.26)	0.15**	(0.05-0.25)	0.05	(-0.09-0.20)
Injuries to the abdomen, lower back, lumbar spine and pelvis (S30-S39)	0.1	(-0.02-0.21)	0.19	(-0.06-0.43)	0.11	(-0.04-0.25)	0.02	(-0.14-0.18)	0.13	(-0.01-0.27)	0.14	(-0.01-0.29)
Injuries to the thorax (S20-S29)	0.27***	(0.15-0.38)	0.22*	(0.00-0.43)	0.27***	(0.13-0.41)	0.25**	(0.09-0.40)	0.28***	(0.17-0.38)	0.19*	(0.01-0.36)
Injuries to the knee and lower leg (S80-S89)	0.04	(-0.09-0.17)	0.21	(-0.01-0.45)	0.02	(-0.15-0.19)	0.06	(-0.08-0.19)	0.05	(-0.06-0.16)	-0.01	(-0.20-0.18)
ISS (ref<16)
16-24	0.25***	(0.15-0.34)	0.30***	(0.16-0.45)	0.22**	(0.09-0.34)	0.32***	(0.22-0.42)	0.29***	(0.20-0.38)	0.18**	(0.06-0.29)
≥25	0.23*	(0.04-0.41)	0.1	(-0.49-0.69)	0.1	(-0.22-0.42)	0.38***	(0.19-0.58)	0.40***	(0.19-0.62)	0.36*	(0.07-0.65)
Multimorbidity (ref=no NCD)
one NCD	0.10*	(0.02-0.18)	0.15	(-0.01-0.29)	0.15**	(0.05-0.25)	0.11*	(0.02-0.20)	0.08	(-0.01-0.16)	0.07	(-0.04-0.17)
two NCD	0.21***	(0.13-0.30)	0.22**	(0.04-0.40)	0.25***	(0.14-0.36)	0.24***	(0.15-0.33)	0.16***	(0.08-0.25)	0.19**	(0.06-0.31)
three or more NCD	0.37***	(0.28-0.47)	0.37***	(0.18-0.55)	0.41***	(0.30-0.52)	0.41***	(0.31-0.52)	0.33***	(0.23-0.43)	0.31***	(0.17-0.44)
CCI ≥3 (ref<3)	0.05	(-0.06-0.15)	-0.07	(-0.24-0.11)	-0.05	(-0.19-0.08)	-0.06	(-0.16-0.03)	-0.06	(-0.15-0.04)	-0.06	(-0.21-0.10)
LOS (ref≤7)
8-14	0.81***	(0.74-0.88)	0.94***	(0.81-1.07)	0.87***	(0.79-0.95)	0.74***	(0.66-0.81)	0.73***	(0.66-0.81)	0.64***	(0.54-0.74)
15-28	1.32***	(1.24-1.40)	1.43***	(1.28-1.57)	1.38***	(1.28-1.48)	1.26***	(1.17-1.34)	1.22***	(1.15-1.30)	1.13***	(1.02-1.23)
≥29	1.93***	(1.82-2.04)	1.95***	(1.72-2.19)	1.86***	(1.70-2.02)	1.86***	(1.70-2.01)	1.92***	(1.81-2.03)	1.84***	(1.67-2.00)
Mode of admission: Emergency admission (ref=Outpatient admission)	0.01	(-0.05-0.07)	0.11*	(0.01-0.21)	0.05	(-0.02-0.12)	0.03	(-0.03-0.09)	-0.03	(-0.09-0.02)	-0.06	(-0.14-0.02)
Admission status (ref=General status)
Critically ill status	0	(-0.18-0.19)	-0.12	(-0.72-0.49)	-0.02	(-0.31-0.26)	0	(-0.20-0.19)	-0.06	(-0.44-0.31)	0.22	(-0.28-0.72)
Urgent status	-0.04	(-0.13-0.05)	-0.01	(-0.17-0.15)	-0.01	(-0.10-0.08)	-0.09	(-0.20-0.03)	-0.04	(-0.13-0.06)	0.02	(-0.12-0.15)
Transferring to other departments, Yes (ref=No)	0.18**	(0.07-0.30)	0.18	(-0.03-0.40)	0.22**	(0.06-0.38)	0.26***	(0.13-0.38)	0.15*	(0.03-0.27)	0.16*	(0.02-0.30)
Intensive care, Yes (ref=No)	0.47***	(0.31-0.64)	0.68***	(0.43-0.93)	0.53***	(0.32-0.74)	0.47***	(0.32-0.63)	0.34***	(0.19-0.49)	0.31	(-0.00-0.61)
Admission to ICU, Yes (ref=No)	0.04	(-0.13-0.21)	0.06	(-0.26-0.39)	0.06	(-0.15-0.27)	-0.09	(-0.29-0.10)	0.06	(-0.13-0.24)	0.11	(-0.15-0.37)
Blood transfusion, Yes (ref=No)	0.27***	(0.14-0.40)	0.44**	(0.17-0.71)	0.26**	(0.08-0.44)	0.26**	(0.14-0.39)	0.14*	(0.03-0.26)	0.23**	(0.06-0.40)
Rescue, Yes (ref=No)	0.22***	(0.09-0.35)	0.02	(-0.24-0.27)	0.08	(-0.10-0.26)	0.22*	(0.03-0.41)	0.30***	(0.17-0.42)	0.24**	(0.07-0.41)
Usage of the ventilator, Yes (ref=No)	0.28***	(0.12-0.44)	0.29	(-0.01-0.59)	0.25*	(0.03-0.48)	0.26**	(0.08-0.44)	0.27**	(0.10-0.44)	0.28*	(0.03-0.52)
In-hospital mortality, Yes (ref=No)	0.04	(-0.14-0.23)	0.06	(-0.45-0.56)	0.07	(-0.26-0.40)	0.13	(-0.14-0.40)	0.19	(-0.01-0.39)	0.15	(-0.14-0.44)
Surgery, Yes (ref=No)	0.63***	(0.55-0.72)	0.48***	(0.30-0.66)	0.65***	(0.52-0.78)	0.59***	(0.50-0.68)	0.63***	(0.54-0.73)	0.66***	(0.55-0.77)
Time (year)	0	(-0.02-0.02)	0	(-0.05-0.04)	0.01	(-0.01-0.04)	0.01	(-0.02-0.03)	0	(-0.02-0.02)	0.02	(-0.01-0.04)
Coefficients estimated after adjusting for all variables in the table; Overall represents the results of multivariable linear regression
Ref Reference, Coeff coefficient, 95%CI 95%Confidence Interval, ISS Injury Severity Score, NCDs non-communicable diseases, CCI Charlson comorbidity index, LOS Length of stay, ICU Intensive care unit.
*p-value < 0.05, **p-value < 0.01, ***p-value < 0.001
